1 **Qinichelins, novel catecholate-hydroxamate siderophores synthesized via a**  
2 **multiplexed convergent biosynthesis pathway**

3

4 Jacob Gubbens,<sup>1</sup> Changsheng Wu,<sup>1</sup> Hua Zhu,<sup>2</sup> Dmitri V. Filippov,<sup>1</sup> Bogdan I. Florea,<sup>1</sup>  
5 Sébastien Rigali,<sup>3</sup> Herman S. Overkleeft,<sup>1</sup> and Gilles P. van Wezel <sup>1,\*</sup>

6

7 <sup>1</sup> *Leiden Institute of Chemistry, Leiden University, Einsteinweg 55, 2333 CC Leiden, The*  
8 *Netherlands*

9 <sup>2</sup> *Molecular Biotechnology, Institute of Biology, Leiden University, Sylviusweg 72, 2333 BE,*  
10 *The Netherlands*

11 <sup>3</sup> *InBioS, Centre for Protein Engineering, University of Liège, Liège, B-4000, Belgium*

12

13 \* Author for correspondence. Tel: +31 71 5274310; email: [g.wezel@biology.leidenuniv.nl](mailto:g.wezel@biology.leidenuniv.nl).

14

15

16 **ABSTRACT**

17 The explosive increase in genome sequencing and the advances in bioinformatic tools have  
18 revolutionized the rationale for natural product discovery from actinomycetes. In particular,  
19 this has revealed that actinomycete genomes contain numerous orphan gene clusters that  
20 have the potential to specify many yet unknown bioactive specialized metabolites,  
21 representing a huge unexploited pool of chemical diversity. Here, we describe the discovery  
22 of a novel group of catecholate-hydroxamate siderophores termed qinichelins (**2–5**) from  
23 *Streptomyces* sp. MBT76. Correlation between the metabolite levels and the protein  
24 expression profiles identified the biosynthetic gene cluster (BGC; named *qch*) most likely  
25 responsible for qinichelin biosynthesis. The structure of the molecules was elucidated by  
26 bioinformatics, mass spectrometry and NMR. Synthesis of the qinichelins requires the  
27 interplay between four gene clusters, for its synthesis and for precursor supply. This  
28 biosynthetic complexity provides new insights into the challenges scientists face when  
29 applying synthetic biology approaches for natural product discovery.

30

31

32 Pride repository reviewer account details:

33 URL: <https://www.ebi.ac.uk/pride/archive/login>

34 Project accession: PXD006577

35 Username: reviewer35793@ebi.ac.uk

36 Password: 3H0iM1FK

37

## 38 INTRODUCTION

39 Actinobacteria are renowned for their ability to manufacture a diversity of bioactive small  
40 molecules.<sup>1, 2</sup> The traditional approach for microbial natural product (NP) discovery typically  
41 involves high-throughput screening of crude extracts derived from cultivable actinomycetes,  
42 followed by iterative bioassay-guided fractionation and structure elucidation. This drug-  
43 discovery pipeline has rewarded us with many useful therapeutic agents, but also turned big  
44 pharma away from NPs for drug-discovery programs due to high cost and chemical  
45 redundancy.<sup>3, 4</sup> The explosive increase in genome-sequence information has uncovered a  
46 vast and yet untapped biosynthetic potential and metabolic diversity, which has brought the  
47 microbial NPs back into the spotlight. However, many of the biosynthetic gene clusters  
48 (BGCs) discovered by genome mining are poorly expressed under laboratory conditions, and  
49 a major new challenge lies in finding the triggers and cues to activate their expression.<sup>5</sup> Such  
50 approaches include, among others, chemical triggers, microbial cocultivation, induction of  
51 antibiotic resistance, and heterologous gene expression.<sup>6-10</sup> In addition, the advances in  
52 genetic tools applied in synthetic biology, such as transformation-associated recombination  
53 (TAR), Red/ET recombination, and CRISPR-Cas9, had aided in the discovery of cryptic  
54 products through engineering of their biosynthetic pathways.<sup>11</sup>

55 A second bottleneck in genomics-based approaches is to establish a link between  
56 genomic and metabolomic data.<sup>5, 12</sup> It is difficult to assign the genetic basis for specific  
57 chemical scaffolds through bioinformatics analysis alone, largely due to nature's flexibility in  
58 catalytic enzymology, i.e. enzyme promiscuity<sup>13</sup> and crosstalk among different gene  
59 clusters.<sup>14, 15</sup> The latter offers a significant hurdle in drug-discovery approaches that are  
60 based solely on heterologous expression of single gene clusters.<sup>16</sup> This gap can be bridged  
61 by genomics-based methodologies that allow statistical correlation between transcript or  
62 protein expression levels on the one hand and abundance of the bioactive molecules on the  
63 other; such correlations allow the linkage between the biosynthetic genes and the bioactivity  
64 of interest, as we and others have previously exemplified.<sup>17-20</sup> Subsequent bioinformatics  
65 analysis of a biosynthetic gene cluster (BGC) provides important (partial) structural

66 information, whereby the architectures of polyketides or nonribosomal peptides may be  
67 inferred from genetic organization due to assembly collinearity.<sup>21</sup> This information can guide  
68 researchers to optimize compound isolation and identification, so as to recover sufficient  
69 quantity of targeted metabolites(s) from highly complex matrices to warrant *de novo*  
70 structural elucidation.<sup>22</sup>

71 Iron is an essential element required for a variety of metabolic processes in living  
72 organisms, but iron acquisition is challenging for most microorganisms due to the insolubility  
73 of iron(III). To cope with iron-limiting conditions, bacteria have evolved siderophores, which  
74 are synthesized by nonribosomal peptide synthases (NRPS) and act as iron scavengers.<sup>23</sup>  
75 Siderophores commonly contain three bidentate ligands in one structure to coordinate iron by  
76 formation of a stable octahedral complex. Their chemical topologies and biosynthetic  
77 machineries have been studied extensively,<sup>14, 15, 24</sup> and a wide range of structures have been  
78 reported. Siderophores are generally classified into the following classes, according to the  
79 functionalities responsible for the chelation of ferric iron (Fe<sup>3+</sup>): catecholates, hydroxamates,  
80 (hydroxy)-carboxylates, and mixed-ligands thereof.<sup>23</sup> Members of the mixed catecholate-  
81 hydroxamate sub-family, including rhodochelin,<sup>15</sup> heterobactins,<sup>25</sup> rhodobactin,<sup>26</sup>  
82 lystabactins,<sup>27</sup> mirubactin,<sup>28</sup> and S-213L,<sup>29</sup> feature both a 2,3-dihydroxybenzoate(s) (2,3-DHB)  
83 moiety and (modified)  $\delta$ -N-hydroxyornithine residues within the same molecule.  
84 Consequently, the biosynthesis of catecholate-hydroxamate siderophores is always initiated  
85 by loading 2,3-DHB as starter unit into the modular NRPS assembly line, followed by  
86 successive incorporation of amino acids, including ornithine, into the growing peptide chain.<sup>15,</sup>  
87 <sup>25, 28</sup>

88 *Streptomyces* sp. MBT76 was previously identified as a prolific producer of antibiotics  
89 against a number of ESKAPE pathogens under specific growth conditions,<sup>30</sup> and time-course  
90 metabolomics analyses revealed it could produce a diversity of secondary metabolites, such  
91 as isocoumarins, prodiginines, acetyltryptamine, and fervenulin.<sup>31</sup> More recently, the  
92 activation of a type II polyketide synthase (PKS) gene cluster (*qin*) in *Streptomyces* sp.  
93 MBT76 induced the production of many other polyketides, including a group of novel

94 glycosylated pyranonaphthoquinones (qinimycins).<sup>32</sup> As this metabolic spectrum was  
95 dominated by polyketides, while the BGCs for NRPS are as commonplace as PKS in  
96 bacterial genomes,<sup>33, 34</sup> we anticipated that peptides were underrepresented in our studies.  
97 Here we describe the discovery and characterization of qinichelins, new mixed-type  
98 catecholate-hydroxamate siderophores from *Streptomyces* sp. MBT76. The aforementioned  
99 limitations in genome-mining strategies were overcome through varying the growth  
100 conditions to fluctuate peptide production. Quantitative proteomics allowed the connection of  
101 the NRPS gene clusters to their metabolic products, enabling the elucidation of qinichelin  
102 and its BGC. This pipeline may also aid the discovery of other families of molecules.

103

104

## 105 **RESULTS AND DISCUSSION**

106

### 107 **Biosynthetic loci for catechol-peptide siderophores are dispersed through the genome** 108 **of *Streptomyces* sp. MBT76**

109 Previously, AntiSMASH<sup>35</sup> analysis of the sequenced genome of *Streptomyces* sp. MBT76  
110 identified 55 putative biosynthetic gene clusters (BGCs) specifying secondary metabolites.<sup>32</sup>  
111 16 of these contained gene(s) encoding NRPS, suggesting rich peptide metabolism. Our  
112 attention was in particular directed to three NRPS BGCs that lay well separated on the  
113 genome and governing the biosynthesis of catechol-peptide siderophores,. The first cluster  
114 was highly homologous to the *ent* cluster from *E. coli*,<sup>36</sup> containing all the essential genes for  
115 enterobactin synthesis. Nevertheless, the gene organization in the *ent* cluster (*entA-C-E-B1-*  
116 *B2-F-D*) of *Streptomyces* sp. MBT76 differed from that in the *E. coli ent* cluster (*entA-F*). In  
117 *Streptomyces* sp. MBT76, the bifunctional *entB* gene was split into two separate genes  
118 *entB1* and *entB2*, encoding an isochorismatase and an acyl carrier protein (ACP) that are  
119 required for 2,3-DHB synthesis and loading, respectively (Figure 1b). This pattern was  
120 actually consistent with the *dhb* operon found in BGCs for the biosynthesis of the structurally  
121 related catechol-peptide siderophores griseobactin<sup>37</sup> and bacillibactin.<sup>38</sup> Interestingly, a gene

122 cluster (*gri*) for griseobactin synthesis lacking this exact *dhb* operon was also found in  
123 *Streptomyces* sp. MBT76 (Figure 1c), suggesting crosstalk between these two BGCs.

124 A third NRPS BGC that we designated *qch* (Table 1 and Figure 1a) contained *qchK*  
125 encoding an MbtH-like protein that is often found associated with NRPS BGCs,<sup>39</sup> and  
126 multiple siderophore-related transporter genes *qchH* and *qchL-P*, suggesting the  
127 biosynthesis of a peptide siderophore. The presence of *qchG*, for an ACP homologous to the  
128 EntB-ACP domain, and the starter condensation (C) domain of *Qchl*, which likely appends a  
129 DHB unit to the *N*-terminus of the peptide, indicated the presence of a DHB moiety in the  
130 final structure.<sup>36</sup> However, genes required for DHB synthesis were not found within or near  
131 the *qch* cluster. Through phylogenetic analysis of adenylation (A) domains,<sup>40</sup> the two core  
132 NRPS (Qchl and QchJ) were predicted to produce a nonribosomal peptide with the  
133 sequence Ser-Orn(ornithine)/Asp-Ser-Ser-Orn-Orn, whereby no clear consensus prediction  
134 could be made for the second A domain. Two epimerization (E) domains in the first and third  
135 modules of Qchl probably transform the stereochemistry of L-Ser into D-Ser, while the  
136 absence of an esterase (TE) domain at the terminus of QchJ indicated an unusual release of  
137 the mature peptide. Consistent with the A-domain analysis of the NRPS, *qch* contained four  
138 genes (*qchA* and *qchCDE*) highly similar to the *arg* genes *argC*, *argJ*, *argB*, and *argD* which  
139 are required for the synthesis of the nonproteinogenic amino acid ornithine from glutamate.<sup>41</sup>  
140 Two accessory genes were predicted to be involved in tailoring of Orn: *qchF* coding for an L-  
141 ornithine-5-monooxygenase, and *qchQ* coding for a GCN5-related *N*-acetyltransferase.<sup>42</sup>  
142 Interestingly, a canonical *arg* cluster<sup>41</sup> for arginine metabolism was also found in the  
143 *Streptomyces* sp. MBT76 genome, including the regulator *argR* and *argE-H* for the  
144 conversion of ornithine to arginine, all of which were lacking in the *qch* gene cluster.

145 Taken together, bioinformatics analysis suggested: i) intertwined functional crosstalk  
146 among three separate BGCs in *Streptomyces* sp. MBT76, allowing production of  
147 catecholate-peptide siderophores; ii) that up to three types of catecholate-peptide  
148 siderophores might be produced by the strain, sharing one set of DHB genes; iii) potentially  
149 novel siderophores derived from the *qch* NRPS that encompass a connectivity of DHB-Ser-

150 Orn/Asp-Ser-Ser-Orn-Orn, whereby the Orn-decorating genes could further diversify the final  
151 products. A search of the CAS database (American Chemical Society,  
152 <http://scifinder.cas.org>) using the predicted DHB-Ser-Orn-Ser-Ser-Orn-Orn sequence as a  
153 query, retrieved S213L (1, [Figure 2](#)),<sup>29</sup> a patented antibiotic/antifungal siderophore with the  
154 sequence DHB-Ser-Orn-Ser-Orn-hOrn-chOrn, as closest hit. The partial sequence for the  
155 S213L BGC has been described,<sup>43</sup> and the linear structure of S213L is compatible with the  
156 modular organization of our central NRPS QchI and QchJ, except for the specificity of the  
157 fourth A domain (Ser vs. Orn). Therefore, we speculated that the *qch* cluster might produce a  
158 related compound **2**, which contains a serine residue instead of ornithine as the fourth amino  
159 acid.

160

#### 161 **Proteomics analysis of the *qch* cluster and identification of the qinichelins**

162 We previously described the *natural product proteomining* pipeline, which makes use of the  
163 strong correlation between the amount of a (bioactive) molecule produced and the  
164 expression level of its biosynthetic proteins.<sup>44</sup> This was applied to efficiently connect genes  
165 (genotype) to a given metabolite or bioactivity of interest (chemotype). The reverse analysis  
166 whereby the expression level of a targeted BGC (known genotype) is used to predict its yet  
167 uncharacterized molecule that is produced (unknown chemotype), should be equally feasible.  
168 Accordingly, this reverse *proteomining* could complement a genome-mining strategy to  
169 facilitate the discovery of novel compounds.

170 As a prerequisite, sufficient fluctuation of protein levels should be achieved as a result of  
171 varying growth conditions.<sup>44</sup> Accordingly, *Streptomyces* sp. MBT76 was grown in modified  
172 liquid minimal medium (NMMP), supplemented with (A) no additive (control), (B) 2% (w/v)  
173 NaCl, (C) 1% (w/v) starch, (D) 0.8% (w/v) peptone, or (E) 0.6% (w/v) yeast extract.  
174 Subsequent quantitative proteomics analysis of whole-cell lysates, using two mixtures of  
175 three samples to compare all growth conditions, yielded 1,472 protein identifications, wherein  
176 relative expression levels of 1,174 proteins were quantified with at least two independent  
177 events, including proteins belonging to the BGCs of interest ([Table 2](#)). Cultures grown in

178 NMMP with peptone and, remarkably, in NMMP without additives, showed strong expression  
179 of the *qch* gene cluster, as demonstrated by the marked upregulation of QchF and QchH-J  
180 when compared to e.g. condition B (NMMP with 2% NaCl). Due to its small size, the dataset  
181 for the QchG protein contained only three quantifications, while the expression of QchA and  
182 ArgC could not be differentiated due to their high sequence similarity. However, the  
183 fluctuation pattern of QchA/ArgC for the five culture conditions was in line with that of all the  
184 other detected Arg proteins, strongly suggesting that the observed signals for QchA/ArgC  
185 were most likely dominated by ArgC rather than QchA.

186 The proteomics analysis demonstrated the expression of the *qch* cluster in, amongst  
187 others, culture condition D (NMMP with peptone) and thus indicated the existence of the  
188 corresponding catecholate-peptide siderophore under these growth conditions. In our  
189 previous metabolomics study of *Streptomyces* sp. MBT76 under the same conditions,<sup>31</sup> no  
190 siderophores were identified, which is most likely due to the use of ethyl acetate for the  
191 extraction, which is not suited for the isolation of the hydrophilic peptidic siderophores.  
192 Therefore, here spent media from five culturing conditions were desalted only and directly  
193 subjected to reverse-phase LC-MS analysis (in positive mode) without any prior extraction,  
194 resulting in the detection of a signal at  $m/z$  772.3 for NMMP (A) and NMMP with peptone (D),  
195 with the strongest signal obtained for A (Figure 3a). The fluctuation pattern of this molecule  
196 correlated well with the expression level of the *qch* gene cluster, suggesting this may be the  
197 sought-after compound **2**. In addition to the molecular ion  $[M + H]^+$  at  $m/z$  772.3 for the iron-  
198 free compound, a co-eluting peak was observed at  $m/z$  825.3 corresponding to the iron-  
199 bound  $[M + Fe^{3+} - 2H]^+$  species. Figure 3a depicts the combined signals for both species to  
200 compensate for any differences in iron(III) concentration among the different culture  
201 conditions.

202 To confirm the structure of **2**, the spent medium of condition A was reanalyzed on a  
203 high resolution LTQ-orbitrap instrument, including both MS<sup>1</sup> and MS<sup>2</sup> analysis. Due to the  
204 use of formic acid instead of trifluoroacetic acid in the eluent, the MS<sup>1</sup> spectrum of **2**  
205 presented the highest intensity at  $m/z$  386.6794 assignable to  $[M + 2H]^{2+}$  species, followed by



206 the  $[M + H]^+$  peak at  $m/z$  772.3500 (Figure S1), within 0.5 ppm accuracy from the predicted  
207 mass. Indeed, the MS<sup>2</sup> analysis yielded almost all the expected fragmentation products of the  
208 predicted compound **2**, with complete sequence coverage for both the b- and y-ion series  
209 (Figure 4a). Moreover, the MS<sup>2</sup> analysis corroborated the hydroxylation of two ornithines  
210 (hOrn-5 and chOrn-6) at the C-terminus, and the cyclization of the last ornithine (chOrn-6).  
211 The most intensive signals were obtained for the b5 and y2 ions, indicating that a potential  
212 hydroxamate bond might be more susceptible to cleavage than an amide bond. However, it  
213 was noteworthy that MS/MS analysis alone was not enough to indicate the presence of a  
214 peptide or isopeptide bond between Ser-4 and hOrn-5. To clarify this, the  $m/z$  772.3 was  
215 used as a probe to guide the separation of target compound from the spent medium of  
216 condition A on reversed phase HPLC. The obtained semi-purified compound **2** was analyzed  
217 by <sup>1</sup>H NMR (850 MHz, in D<sub>2</sub>O, Table 3), COSY, HSQC, and HMBC techniques (Figure  
218 S2–S6), which indeed supported a catecholate-hexapeptide architecture comprising three  
219 serine and three ornithine residues. In particular, a key HMBC correlation from H<sub>2</sub>-5 of hOrn-  
220 5 to C-1 of Ser-4 established that the linkage between these two residues was through the δ-  
221 hydroxylated-amine rather than α-amine of hOrn-5. The free amine group at C-2 of hOrn-5  
222 could be also reflected by the upfield shifted H-2 ( $\delta_H$  3.99), in contrast to the amidated H-2 of  
223 Orn-2 ( $\delta_H$  4.44) and chOrn-6 ( $\delta_H$  4.40).

224 Together, these experiments confirmed to existence and the precise chemical structure  
225 of compound **2**. With three iron-coordinating groups including one DHB moiety and two  
226 hydroxamates, our new compound resembles other mixed-ligand siderophores like  
227 amyachelin<sup>24</sup> and gobichelin.<sup>45</sup> This strongly suggested that compound **2** was a siderophore,  
228 which was named qinichelin. The name refers to the origin of *Streptomyces* sp. MBT76,  
229 which was isolated from the Qinling Mountains in China.<sup>30</sup>

230

231 **High resolution MS/MS analysis reveals production of qinichelin variants (3–5),**  
232 **griseobactin, but not enterobactin**

233 We suspected that an acetylated analogue of qinichelin could be produced by *Streptomyces*  
234 sp. MBT76, because acetylation by an *N*-acetyltransferase encoded by *qchQ* had not yet  
235 been found in qinichelin. Indeed, we observed an  $[M + H]^+$  species at  $m/z$  814.3587 for  
236 acetylated qinichelin, with a slightly longer retention time than qinichelin. The high  
237 abundance of an  $[M + H]^+$  species instead of  $[M + 2H]^{2+}$  already indicated that one of the two  
238 free amines in qinichelin,  $\delta$ -NH<sub>2</sub> in Orn-2 or  $\alpha$ -NH<sub>2</sub> in hOrn-5, was acetylated, while a  
239 derivative with both acetylations was not detected. Upon fragmentation for MS/MS analysis,  
240 a surprising result was obtained because the fragmentation spectrum (Figure 4b)  
241 corresponded to a mixture of two different acetylated peptides 3 and 4 (Figure 2). Some  
242 masses could only be assigned to acetylation at  $\delta$ -NH<sub>2</sub> in Orn-2 while other masses indicated  
243 acetylation of  $\alpha$ -NH<sub>2</sub> in hOrn-5. Since fragmentation of this  $[M + H]^+$  ion was less efficient than  
244 the unacetylated  $[M + 2H]^{2+}$  ion (Figure 4a), a complete sequence coverage could not be  
245 achieved for b- and y-ions. However, at least one b- or y-ion was present for each  
246 peptide/hydroxamate bond for both variants, thus providing strong evidence for the position  
247 of the posttranslational modification. In addition, qinichelin variant 5 gave a  $[M]^+$  peak at  $m/z$   
248 755.3314, and the characteristic fragment at  $m/z$  512.2096 indicated an Orn-5 instead of an  
249 hOrn-5 residue (Figure S7). We did not obtain sufficient amounts of compounds 3–5 for 2D  
250 NMR analysis, as they are minor relative to 2.

251 Since the proteomics analysis also revealed expression of the *ent* and *gri* clusters  
252 (Table 2), we attempted to find their respective products, enterobactin and griseobactin, by  
253 MS/MS analysis. Indeed, griseobactin could be readily detected with highest intensity at  $m/z$   
254 394.1720 for the  $[M+3H]^{3+}$  species, within 0.5 ppm of the expected mass. Another signal was  
255 observed for the  $[M+2H]^{2+}$  species at  $m/z$  590.7538, with an MS/MS fragmentation pattern  
256 corresponding exactly with published data.<sup>46</sup> Surprisingly, no enterobactin could be detected.  
257 This suggests that the *ent* cluster may only code for 2,3-DHB synthesis for griseobactin and  
258 qinichelin production in *Streptomyces* sp. MBT76, leaving *entF* non-functional.

259

260 **Qinichelin production belongs to the iron homeostasis regulon**

261 To support the iron-chelating function of qinichelin and its possible role in iron homeostasis of  
262 *Streptomyces* sp. MBT76, we searched for the occurrence of iron boxes within the qinichelin  
263 BGC. Iron boxes are *cis*-acting elements with a 19 bp palindromic consensus sequence  
264 TTAGGTTAGGCTAACCTAA that are bound by DmdR1, the global iron regulator in  
265 *Streptomyces* species.<sup>47</sup> When sufficient iron is available, the DmdR1-Fe<sup>2+</sup> complex binds to  
266 iron boxes and represses the expression of siderophore biosynthetic and importer genes.<sup>47</sup>  
267 The dramatic reduction in qinichelin production in an iron-rich condition suggested that the  
268 expression of *qch* cluster would also be under the negative control of DmdR1 (Figure 3b).  
269 Indeed, four highly conserved iron boxes were found within the BGC: (i) upstream of the  
270 predicted pentacistronic operon *qchA-E* involved in ornithine synthesis from glutamate, (ii)  
271 upstream of *qchF* coding for the L-ornithine 5-monooxygenase, (iii) upstream of the  
272 tricistronic operon (*qchN-P*) predicted to be involved in qinichelin transport, and (iv) upstream  
273 of *qchQ* that encodes the predicted qinichelin *N*-acetyltransferase (Table S1). The iron box  
274 identified 109 nt upstream of *qchF* displayed the perfect palindromic sequence  
275 TTAGGTTAGGCTAACCTAA, which made it highly likely that the central NRPS genes of the  
276 *qch* cluster were regulated by DmdR1. Furthermore, the iron box upstream of the predicted  
277 qinichelin transporter system (*qchN-P* in Figure 1) was more conserved than most of iron  
278 boxes identified upstream of other siderophore uptake system genes present in the  
279 *Streptomyces* sp. MBT76 genome (Table S1). In addition, three iron boxes were identified in  
280 the *gri* cluster and one in the *ent* cluster (Figure 1, and Table S1), suggesting that  
281 siderophore production in *Streptomyces* sp. MBT76 is indeed under control of DmdR1.

282 Interestingly, scanning for ARG boxes (consensus sequence  
283 CCATGCATGCCATTGCATA) that are bound by the Arginine repressor ArgR<sup>48</sup> revealed  
284 no reliable *cis*-acting sequences upstream of the *qchA-E* operon. Instead, the *argCJBDR*  
285 gene cluster outside the qinichelin biosynthetic cluster displayed the putative ARG box at  
286 position -87 nt upstream of *argC*. This suggests differential regulation of the arginine  
287 biosynthetic genes from primary metabolism and those involved in secondary metabolism.

288

## 289 **Biosynthesis of qinichelins relies on coordination between multiple BGCs**

290 The theoretical analysis and the experimental identification of griseobactin and qinichelins,  
291 allowed us to postulate an intertwined model for the production of catecholate-peptide  
292 siderophores in *Streptomyces* sp. MBT76 (Figure 5). The chorismate pathway within the *ent*  
293 gene cluster provides the building block 2,3-DHB to the three NRPS EntF, GriE, and QchI-  
294 QchJ, for enterobactin, griseobactin, and qinichelin respectively. The 2,3-DHB moiety is  
295 activated by 2,3-dihydroxybenzoate-AMP ligase EntE and subsequently transferred to stand-  
296 alone aryl carrier proteins QchG or EntB2. As the necessary gene coding for the aryl carrier  
297 protein is lacking in the griseobactin BGC, this requirement could be remedied by either  
298 QchG or EntB2 to deliver the activated 2,3-DHB starter unit for GriE. The further  
299 mechanisms for NRPS assembly of enterobactin and griseobactin have been elaborated  
300 elsewhere.<sup>37, 49</sup> The coordinated expression of multiple NRPS gene clusters for siderophore  
301 production in *Streptomyces* sp. MBT76 is striking but not unprecedented. Similar functional  
302 crosstalk between different NRPS BGCs was demonstrated for the assembly of the  
303 siderophores erythrochelin in *Saccharopolyspora erythraea*<sup>14</sup> and rhodochelin in  
304 *Rhodococcus jostii* RHA1.<sup>15</sup> Such crosstalk could enable structural diversity for siderophores  
305 on the basis of a limited number of biosynthetic genes, and thus confer an evolutionary  
306 advantage for the producing bacteria in terms of iron acquisition. In particular, it would be  
307 advantageous for one bacterium to evolve specific siderophore(s) for their own benefit, to  
308 compete with the “siderophore pirates” that use siderophores biosynthesized by other  
309 species.<sup>50</sup> For example, the structurally novel amyachelin produced by *Amycolatopsis* sp. AA4,  
310 seems to frustrate “siderophore piracy” of *Streptomyces coelicolor* by inhibiting its  
311 development.<sup>24</sup>

312 The assembly of the catecholate-hexapeptide backbone in qinichelin follows an orthodox  
313 linear logic of modular NRPS. Each module in QchI and QchJ contains an adenylation (A)  
314 domain for recognition of correct amino acid substrate, whereby Ser-1, Orn-2, Ser-3, Ser-4,  
315 hOrn-5, and hOrn-6, are sequentially bound and converted to aminoacyl adenylates. The two  
316 serine residues can be converted from the initial L-form<sup>51</sup> into its D-stereoisomer by the

317 epimerization (E) domain in modules 1 and 3. After QchG-mediated incorporation of 2,3-DHB,  
318 each condensation (C) domain is successively used to elongate the chain by formation of a  
319 peptide bond with the activated amino acid, except for the isopeptide bond catalyzed by C  
320 domain 5, while the growing peptide chain is tethered to peptidyl carrier proteins (PP). Finally,  
321 qinichelin is released from the last PP domain through an intramolecular nucleophilic  
322 substitution of the  $\delta$ -hydroxylamino group of L-hOrn-6 to the carbonyl group of the thioester.  
323 However, it is challenging to understand the enzymology responsible for this reaction,  
324 because a usual thioesterase (TE) domain (e.g. in NRPS assembling gobichelin<sup>45</sup> and  
325 heterobactin<sup>25</sup>) required for peptide chain release is lacking in the C-terminus of QchJ. It is  
326 tempting to speculate that the C domain in module 6 catalyzes both the  $\alpha$ -amidation of hOrn-  
327 6 to finalize the growing peptide chain, and  $\delta$ -amidation to self-cyclize the last  
328 hydroxyornithine (chOrn-6) to release the peptide chain from NRPS system. A similar  
329 scenario for peptide chain release has recently been reported in the biosynthesis of  
330 scabichelin,<sup>52</sup> a pentapeptide siderophore containing a C-terminal cyclic hydroxyornithine  
331 residue as in qinichelin.

332 The ornithine building block for qinichelin assembly may originate from either the *qch*  
333 cluster or from the canonical *arg* gene cluster,<sup>41</sup> regulated by DmdR1 and ArgR, respectively.  
334 This would allow decoupling of qinichelin production from primary metabolism. The  
335 generated Orn precursor is further tailored, including hydroxylation at  $\delta$ -NH<sub>2</sub> by QchF, and/or  
336 acetylation at  $\alpha$ -NH<sub>2</sub> and  $\delta$ -NH<sub>2</sub> by QchQ. Alternatively,  $\alpha$ -N-acetylation could arise from the  
337 bifunctional enzyme ArgJ (or its counterpart QchC) during ornithine precursor synthesis.<sup>53</sup>  
338 The characterization of qinichelin congeners (**3–5**) provides evidence for substrate flexibility  
339 of the A<sub>Orn</sub> domain in modules 2 and 5, whereby unmodified ornithine (Orn),  $\delta$ -N-hydroxyl  
340 ornithine (hOrn),  $\alpha$ -N-acetyl ornithine,  $\delta$ -N-acetyl ornithine, and  $\delta$ -N-hydroxyl- $\alpha$ -N-acetyl  
341 ornithine can be recognized and incorporated into the NRPS assembly. Still, we cannot rule  
342 out that QchQ post-translationally acetylates either free amine after construction of the final  
343 qinichelin. Indeed, it is difficult to discriminate between A domains activating Orn and/or hOrn  
344 through bioinformatics alone.<sup>54</sup> However, since qinichelin (**2**) was the major chemical output

345 of *qch* gene cluster, unmodified ornithine (Orn) and  $\delta$ -*N*-hydroxyl ornithine (hOrn) are most  
346 likely preferred by  $A_{Orn}$  in module 2 and module 5, respectively.

347

348

349

## 350 **CONCLUSIONS**

351 Actinomycetes adopt versatile strategies to biosynthesize structurally diverse secondary  
352 metabolites. This includes the production of a variety of siderophores, although it is not  
353 always clear what the advantage is in terms of the competition for iron in the environment.  
354 Functional crosstalk among multiple distantly located BGCs is not always predicted well by  
355 bioinformatics analysis. Therefore, chemical novelty may be missed if we solely rely on  
356 synthetic biology approaches, such as heterologous expression of a single BGC. The  
357 “protein-first” method, via reverse *natural product proteomining*, effectively identified the *qch*  
358 gene cluster expression in *Streptomyces* sp. MBT76, and further guided the characterization  
359 of qinichelins **2–5**, a family of new catecholate-hydroxamate siderophores. The principles  
360 presented in this work can be exploited to discover a broader range of chemical frameworks  
361 and to elucidate other intertwined biosynthetic scenarios.

362

363

## 364 **EXPERIMENTAL SECTION**

### 365 **Strains and Growth conditions**

366 *Streptomyces* sp. MBT76 isolation from Qinling mountain soil,<sup>30</sup> general growth conditions,  
367 and genome sequencing (GenBank accession number: LNBE00000000) have been  
368 described before.<sup>31, 32</sup> Here, *Streptomyces* sp. MBT76 was grown in liquid NMMP medium<sup>55</sup>  
369 containing 1% (w/v) glycerol and 0.5% (w/v) mannitol as carbon sources, but lacking  
370 polyethylene glycol. This basic NMMP medium were perturbed by using four different  
371 additives (or no additive) to create varying growth conditions: (A) no additive, (B) 2% (w/v)

372 NaCl, (C) 1% (w/v) starch, (D) 0.8% (w/v) Bacto peptone (Difco), (E) 0.6% (w/v) Bacto yeast  
373 extract (Difco). For iron-starvation study, the minor element solution <sup>55</sup> was omitted from  
374 condition A. All the cultures of *Streptomyces* sp. MBT76 were incubated at 30 °C for 72  
375 hours, with constant shaking at 220 rpm.

376

### 377 **Proteomics**

378 *Streptomyces* sp. MBT76 cells were lysed using acetone/SDS as essentially described,<sup>56</sup>  
379 since our ordinary ice sonication gave unsatisfactory results. Mycelium was washed in 2 ml  
380 of 100 mM Tris/HCl buffer (pH 7.5) supplemented with 10 mM MgCl<sub>2</sub>, and then resuspended  
381 in 5 ml of ice cold acetone for 10 min. After removal of acetone by centrifugation, the pellets  
382 were resuspended in 1 ml of 1% (w/v) SDS for 2 min. The resulting protein suspension  
383 (stored at -20 °C when necessary) was separated from the debris by centrifugation, and the  
384 protein concentrations were determined using the Qubit fluorometric system (Thermo) with  
385 BSA standard.

386 Some 167 µg of protein was precipitated for each sample using chloroform/methanol,<sup>57</sup>  
387 and then dissolved using RapiGest SF surfactant (Waters, Milford MA). The proteins were  
388 further digested with trypsin after iodoacetamide treatment,<sup>58</sup> and the resulting primary  
389 amines of the peptides were dimethyl labeled using three combinations of isotopomers of  
390 formaldehyde and cyanoborohydride on Sep-Pak C<sub>18</sub> 200 mg columns (Waters, Milford MA),  
391 via CH<sub>2</sub>O + NaBH<sub>3</sub>CN, CD<sub>2</sub>O + NaBH<sub>3</sub>CN, and <sup>13</sup>CD<sub>2</sub>O + NaBD<sub>3</sub>CN, as described.<sup>59</sup> Light-,  
392 medium-, and heavy-labeled peptides with 4 Da mass differences were mixed 1:1:1 to obtain  
393 0.5 mg for fractionation by cationic exchange (SCX) chromatography using a polysulfoethyl A  
394 column (PolyLC, 100 x 2.1 mm, particle size 5 µm, average pore size 200 Å). Mobile phases  
395 for SCX chromatography consisted of solvent A (10 mM KH<sub>2</sub>PO<sub>4</sub>, 20% (v/v) acetonitrile, pH  
396 3) and solvent B (10 mM KH<sub>2</sub>PO<sub>4</sub>, 20% (v/v) acetonitrile, 0.5 M KCl, pH 3). The running  
397 program for SCX was a gradient of 0-18% solvent B in 18 CV (column volume), 18-30%  
398 solvent B in 6 CV, and 30-100% solvent B in 5 CV, at a constant flow rate of 250 µl/min. In  
399 total, 24 peptide fractions were collected for LC-MS/MS analysis on an LTQ-Orbitrap



400 instrument (Thermo).<sup>58</sup> Data analysis was performed using MaxQuant 1.4.1.2,<sup>60</sup> whereby MS/  
401 MS spectra were searched against a database of translated coding sequences obtained from  
402 genome of *Streptomyces* sp. MBT76. The mass spectrometry proteomics data have been  
403 deposited to the ProteomeXchange Consortium  
404 (<http://proteomecentral.proteomexchange.org>) via the PRIDE partner repository with the  
405 dataset identifier PXD006577.

406

#### 407 **LC-MS analysis of metabolites**

408 Spent medium samples were acidified with 1% (v/v) formic acid final concentration) and  
409 desalted using StageTips.<sup>61</sup> 20  $\mu$ l of samples were separated on an Finnigan Surveyor HPLC  
410 (Thermo) equipped with a Gemini C<sub>18</sub> column (Phenomenex, 4.6 x 50 mm, particle size 3  
411  $\mu$ m, pore size 110 Å) at a flow rate of 1 mL/min and using a 0-50% B gradient in 10 CV.  
412 Mass spectrometry was performed using an Finnigan LCQ advantage (Thermo) equipped  
413 with an ESI source in the positive mode and scanning at 160 – 2,000  $m/z$ .

414 For high resolution LC-MS/MS analysis on an LTQ-orbitrap the same setup was used  
415 as above for proteomics analysis,<sup>62</sup> but using different run parameters. Mobile phases were:  
416 A) 0.1% (v/v) formic acid in H<sub>2</sub>O and B) 0.1% formic acid in acetonitrile. A 30 min 10-20% B  
417 gradient was followed by a 15 min 20-50% B gradient, both at a flow rate of 300  $\mu$ L/min split  
418 to 250 nL/min by the LTQ divert valve. For each data-dependent cycle, one full MS scan (100-  
419 2,000  $m/z$ ) acquired at a resolution of 30,000 was followed by two MS/MS scans (100-2,000  
420  $m/z$ ), again acquired in the orbitrap at a resolution of 30,000, with an ion selection threshold  
421 of  $1 \times 10^7$  counts but no charge exclusions. Other fragmentations parameters were as  
422 described for the proteomics analysis.<sup>62</sup> After two fragmentations within 10 s, precursor ions  
423 were dynamically excluded for 120 s with an exclusion width of  $\pm 10$  ppm.

424

#### 425 **Isolation of qinichelins**



426 5 ml of spent medium from NMMP-grown cultures was desalted on Sep-Pak SPE C<sub>18</sub> 200 mg  
427 columns (Waters). Columns were first washed with 1 ml of 80% (v/v) acetonitrile + 0.1% (v/v)  
428 formic acid, and then equilibrated with 1 ml of 0.1% (v/v) formic acid. 5 ml of spent medium  
429 was mixed with 1 ml of 5% (v/v) formic acid and loaded onto the column. After wash with 1  
430 ml of 0.1% (v/v) formic acid, the column was eluted with 600  $\mu$ l of 80% (v/v) acetonitrile +  
431 0.1% (v/v) formic acid. The resulting sample was dried in a speedvac to remove acetonitrile  
432 and resuspended in 900  $\mu$ l of 3% (v/v) acetonitrile + 0.1% (v/v) formic acid. This desalted  
433 sample was separated by HPLC on an Agilent 1200 series instrument equipped with a  
434 Gemini C<sub>18</sub> column (Phenomenex, 250 x 10 mm, particle size 5  $\mu$ m, pore size 110 Å ), eluting  
435 with a gradient of acetonitrile in H<sub>2</sub>O adjusted with 0.15% (v/v) trifluoroacetic acid from 6% to  
436 12%. The HPLC run was performed in 3 CV at a flow rate of 5 ml/min, and the fractions were  
437 collected based on UV absorption at 307 nm. All fractions were analyzed by LC-MS (positive  
438 mode) to check the existence of the targeted mass at  $m/z$  772.3. The fraction of interest was  
439 lyophilized, and subsequently reconstituted in deuterated water (D<sub>2</sub>O) for NMR (850 MHz)  
440 measurement.

441

#### 442 **DmdR1 and ArgR regulon predictions**

443 The putative binding sites for the iron utilization regulator DmdR1 and for the arginine  
444 biosynthesis regulator ArgR were detected on the chromosome of *Streptomyces* sp. MBT76  
445 using the PREDetector software<sup>63</sup> and according to the method described.<sup>64</sup> For the  
446 generation of the DmdR1 position weight matrix (PWM) we used the sequence of the iron  
447 box which lies at position -82 nt upstream of *desA* (SCO2782) and previously shown to be  
448 bound by DmdR1 in *S. coelicolor*.<sup>65</sup> In order to acquire more highly reliable iron boxes to  
449 generate the PWM we scanned the upstream region of the orthologues of *desA* in five other  
450 *Streptomyces* species and retrieved their respective iron boxes (see supplementary Fig. S8).  
451 A set of ARG boxes experimentally validated in *S. clavuligerus*<sup>66</sup> and *S. coelicolor*<sup>48</sup> were  
452 used to generate the ArgR PWM (see supplementary Fig. S9).

453

454 **Acknowledgements**

455 This work was supported by a grant from the Chinese Scholarship Council to CW and by a  
456 VENI grant from the Netherlands Foundation for Scientific Research (NWO) to GPvW.

457

458 **Conflict of interest statement**

459 The authors declare no conflict of interests.

460

461

462

463 **REFERENCES**

- 464 1. Barka, E. A., Vatsa, P., Sanchez, L., Gavaut-Vaillant, N., Jacquard, C., Meier-Kolthoff, J.,  
465 Klenk, H. P., Clément, C., Oudouch, Y., and van Wezel, G. P. (2016) Taxonomy,  
466 physiology, and natural products of the *Actinobacteria*, *Microbiol Mol Biol Rev* 80, 1-  
467 43.
- 468 2. Bérdy, J. (2005) Bioactive microbial metabolites, *J Antibiot (Tokyo)* 58, 1-26.
- 469 3. Cooper, M. A., and Shlaes, D. (2011) Fix the antibiotics pipeline, *Nature* 472, 32.
- 470 4. Payne, D. J., Gwynn, M. N., Holmes, D. J., and Pompliano, D. L. (2007) Drugs for bad  
471 bugs: confronting the challenges of antibacterial discovery, *Nat Rev Drug Discov* 6,  
472 29-40.
- 473 5. Doroghazi, J. R., Albright, J. C., Goering, A. W., Ju, K. S., Haines, R. R., Tchalukov, K. A.,  
474 Labeda, D. P., Kelleher, N. L., and Metcalf, W. W. (2014) A roadmap for natural  
475 product discovery based on large-scale genomics and metabolomics, *Nat Chem Biol*  
476 10, 963-968.
- 477 6. Craney, A., Ozimok, C., Pimentel-Elardo, S. M., Capretta, A., and Nodwell, J. R. (2012)  
478 Chemical perturbation of secondary metabolism demonstrates important links to  
479 primary metabolism, *Chem Biol* 19, 1020-1027.
- 480 7. Hosaka, T., Ohnishi-Kameyama, M., Muramatsu, H., Murakami, K., Tsurumi, Y., Kodani,  
481 S., Yoshida, M., Fujie, A., and Ochi, K. (2009) Antibacterial discovery in  
482 actinomycetes strains with mutations in RNA polymerase or ribosomal protein S12,  
483 *Nat Biotechnol* 27, 462-464.
- 484 8. Rutledge, P. J., and Challis, G. L. (2015) Discovery of microbial natural products by  
485 activation of silent biosynthetic gene clusters, *Nat Rev Microbiol* 13, 509-523.
- 486 9. van der Meij, A., Worsley, S. F., Hutchings, M. I., and van wezel, G. P. (2017) Chemical  
487 ecology of antibiotic production by actinomycetes, *FEMS Microbiol Rev*, in press.

- 488 10. Zhu, H., Sandiford, S. K., and van Wezel, G. P. (2014) Triggers and cues that activate  
489 antibiotic production by actinomycetes, *J Ind Microbiol Biotechnol* **41**, 371-386.
- 490 11. Seyedsayamdost, M. R., and Clardy, J. (2014) Natural Products and Synthetic Biology,  
491 *ACS Synth. Biol.* **3**, 745-747.
- 492 12. Wu, C., Kim, H. K., van Wezel, G. P., and Choi, Y. H. (2015) Metabolomics in the natural  
493 products field - a gateway to novel antibiotics, *Drug Discov Today Technol* **13**, 11-17.
- 494 13. Wu, C., Medema, M. H., Läkamp, R. M., Zhang, L., Dorrestein, P. C., Choi, Y. H., and  
495 van Wezel, G. P. (2016) Leucanicidin and Endophenazines Result from Methyl-  
496 Rhamnosylation by the Same Tailoring Enzymes in *Kitasatospora* sp. MBT66, *ACS*  
497 *Chem. Biol.* **11**, 478-490.
- 498 14. Lazos, O., Tosin, M., Slusarczyk, A. L., Boakes, S., Cortés, J., Sidebottom, P. J., and  
499 Leadlay, P. F. (2010) Biosynthesis of the Putative Siderophore Erythrochelin  
500 Requires Unprecedented Crosstalk between Separate Nonribosomal Peptide Gene  
501 Clusters, *Chem. Biol.* **17**, 160-173.
- 502 15. Bosello, M., Robbel, L., Linne, U., Xie, X., and Marahiel, M. A. (2011) Biosynthesis of the  
503 siderophore rhodochelin requires the coordinated expression of three independent  
504 gene clusters in *Rhodococcus jostii* RHA1, *J. Am. Chem. Soc.* **133**, 4587-4595.
- 505 16. Kolter, R., and van Wezel, G. P. (2016) Goodbye to brute force in antibiotic discovery?,  
506 *Nat Microbiol* **1**, 15020.
- 507 17. Bumpus, S. B., Evans, B. S., Thomas, P. M., Ntai, I., and Kelleher, N. L. (2009) A  
508 proteomics approach to discovering natural products and their biosynthetic pathways,  
509 *Nat Biotechnol* **27**, 951-956.
- 510 18. Gubbens, J., Zhu, H., Girard, G., Song, L., Florea, B. I., Aston, P., Ichinose, K., Filippov,  
511 D. V., Choi, Y. H., Overkleeft, H. S., Challis, G. L., and van Wezel, G. P. (2014)  
512 Natural product proteomining, a quantitative proteomics platform, allows rapid  
513 discovery of biosynthetic gene clusters for different classes of natural products, *Chem*  
514 *Biol* **21**, 707-718.
- 515 19. Kersten, R. D., Ziemert, N., Gonzalez, D. J., Duggan, B. M., Nizet, V., Dorrestein, P. C.,  
516 and Moore, B. S. (2013) Glycogenomics as a mass spectrometry-guided genome-  
517 mining method for microbial glycosylated molecules, *Proc Natl Acad Sci U S A* **110**,  
518 E4407-4416.
- 519 20. Meier, J. L., Niessen, S., Hoover, H. S., Foley, T. L., Cravatt, B. F., and Burkart, M. D.  
520 (2009) An orthogonal active site identification system (OASIS) for proteomic profiling  
521 of natural product biosynthesis, *ACS Chem Biol* **4**, 948-957.
- 522 21. Tietz, J. I., and Mitchell, D. (2016) Using Genomics for Natural Product Structure  
523 Elucidation, *Curr. Top. Med. Chem.* **16**, 1645-1694.

- 524 22. Jensen, P. R., Chavarria, K. L., Fenical, W., Moore, B. S., and Ziemert, N. (2014)  
525 Challenges and triumphs to genomics-based natural product discovery, *J. Ind.*  
526 *Microbiol. Biotechnol.* *41*, 203-209.
- 527 23. Miethke, M., and Marahiel, M. A. (2007) Siderophore-Based Iron Acquisition and  
528 Pathogen Control, *Microbiol. Mol. Biol. Rev.* *71*, 413-451.
- 529 24. Seyedsayamdost, M. R., Traxler, M. F., Zheng, S. L., Kolter, R., and Clardy, J. (2011)  
530 Structure and biosynthesis of amyachelin, an unusual mixed-ligand siderophore from  
531 *amycolatopsis* sp. AA4, *J. Am. Chem. Soc.* *133*, 11434-11437.
- 532 25. Bosello, M., Zeyadi, M., Kraas, F. I., Linne, U., Xie, X., and Marahiel, M. A. (2013)  
533 Structural characterization of the heterobactin siderophores from *rhodococcus*  
534 *erythropolis* PR4 and elucidation of their biosynthetic machinery, *J. Nat. Prod.* *76*,  
535 2282-2290.
- 536 26. Dhungana, S., Michalczyk, R., Boukhalfa, H., Lack, J. G., Koppisch, A. T., Fairlee, J. M.,  
537 Johnson, M. T., Ruggiero, C. E., John, S. G., Cox, M. M., Browder, C. C., Forsythe, J.  
538 H., Vanderberg, L. A., Neu, M. P., and Hersman, L. E. (2007) Purification and  
539 characterization of rhodobactin: A mixed ligand siderophore from *Rhodococcus*  
540 *rhodochrous* strain OFS, *BioMetals* *20*, 853-867.
- 541 27. Zane, H. K., and Butler, A. (2013) Isolation, structure elucidation, and iron-binding  
542 properties of lystabactins, siderophores isolated from a marine *Pseudoalteromonas*  
543 sp., *J. Nat. Prod.* *76*, 648-654.
- 544 28. Giessen, T. W., Franke, K. B., Knappe, T. A., Kraas, F. I., Bosello, M., Xie, X., Linne, U.,  
545 and Marahiel, M. A. (2012) Isolation, structure elucidation, and biosynthesis of an  
546 unusual hydroxamic acid ester-containing siderophore from *actinosynnema mirum*, *J.*  
547 *Nat. Prod.* *75*, 905-914.
- 548 29. Owaku, K., Umashima, T., Matsugami, M., Goto, M., Nakajima, T., Ito, T., Ikuko, K.,  
549 Nozawa, A., and Miki, T. (2000) Antifungal antibiotic S-213L manufacture with  
550 *Streptomyces*, Japan.
- 551 30. Zhu, H., Swierstra, J., Wu, C., Girard, G., Choi, Y. H., van Wamel, W., Sandiford, S. K.,  
552 and van Wezel, G. P. (2014) Eliciting antibiotics active against the ESKAPE  
553 pathogens in a collection of actinomycetes isolated from mountain soils, *Microbiology*  
554 *160*, 1714-1725.
- 555 31. Wu, C., Zhu, H., van Wezel, G. P., and Choi, Y. H. (2016) Metabolomics-guided analysis  
556 of isocoumarin production by *Streptomyces* species MBT76 and biotransformation of  
557 flavonoids and phenylpropanoids, *Metabolomics* *12*, 90.
- 558 32. Wu, C., Du, C., Ichinose, K., Choi, Y. H., and van Wezel, G. P. (2016) The cryptic qin  
559 gene cluster of *Streptomyces* sp. MBT76 specifies C-  
560 glycosylpyranonaphthoquinones, *J. Nat. Prod.*, In press.

- 561 33. Donadio, S., Monciardini, P., and Sosio, M. (2007) Polyketide synthases and  
562 nonribosomal peptide synthetases: the emerging view from bacterial genomics, *Nat*  
563 *Prod Rep* 24, 1073-1109.
- 564 34. Medema, M. H., and Kottmann, R., and Yilmaz, P., and Cummings, M., and Biggins, J.  
565 B., and Blin, K., and de Bruijn, I., and Chooi, Y. H., and Claesen, J., and Coates, R.  
566 C., and Cruz-Morales, P., and Duddela, S., and Dusterhus, S., and Edwards, D. J.,  
567 and Fewer, D. P., and Garg, N., and Geiger, C., and Gomez-Escribano, J. P., and  
568 Greule, A., and Hadjithomas, M., and Haines, A. S., and Helfrich, E. J., and Hillwig,  
569 M. L., and Ishida, K., and Jones, A. C., and Jones, C. S., and Jungmann, K., and  
570 Kegler, C., and Kim, H. U., and Kotter, P., and Krug, D., and Masschelein, J., and  
571 Melnik, A. V., and Mantovani, S. M., and Monroe, E. A., and Moore, M., and Moss, N.,  
572 and Nutzmann, H. W., and Pan, G., and Pati, A., and Petras, D., and Reen, F. J., and  
573 Rosconi, F., and Rui, Z., and Tian, Z., and Tobias, N. J., and Tsunematsu, Y., and  
574 Wiemann, P., and Wyckoff, E., and Yan, X., and Yim, G., and Yu, F., and Xie, Y., and  
575 Aigle, B., and Apel, A. K., and Balibar, C. J., and Balskus, E. P., and Barona-Gomez,  
576 F., and Bechthold, A., and Bode, H. B., and Borriss, R., and Brady, S. F., and  
577 Brakhage, A. A., and Caffrey, P., and Cheng, Y. Q., and Clardy, J., and Cox, R. J.,  
578 and De Mot, R., and Donadio, S., and Donia, M. S., and van der Donk, W. A., and  
579 Dorrestein, P. C., and Doyle, S., and Driessen, A. J., and Ehling-Schulz, M., and  
580 Entian, K. D., and Fischbach, M. A., and Gerwick, L., and Gerwick, W. H., and Gross,  
581 H., and Gust, B., and Hertweck, C., and Hofte, M., and Jensen, S. E., and Ju, J., and  
582 Katz, L., and Kaysser, L., and Klassen, J. L., and Keller, N. P., and Kormanec, J., and  
583 Kuipers, O. P., and Kuzuyama, T., and Kyrpides, N. C., and Kwon, H. J., and Lautru,  
584 S., and Lavigne, R., and Lee, C. Y., and Linquan, B., and Liu, X., and Liu, W., and  
585 Luzhetskyy, A., and Mahmud, T., and Mast, Y., and Mendez, C., and Metsa-Ketela,  
586 M., and Micklefield, J., and Mitchell, D. A., and Moore, B. S., and Moreira, L. M., and  
587 Muller, R., and Neilan, B. A., and Nett, M., and Nielsen, J., and O'Gara, F., and  
588 Oikawa, H., and Osbourn, A., and Osburne, M. S., and Ostash, B., and Payne, S. M.,  
589 and Pernodet, J. L., and Petricek, M., and Piel, J., and Ploux, O., and Raaijmakers, J.  
590 M., and Salas, J. A., and Schmitt, E. K., and Scott, B., and Seipke, R. F., and Shen,  
591 B., and Sherman, D. H., and Sivonen, K., and Smanski, M. J., and Sosio, M., and  
592 Stegmann, E., and Sussmuth, R. D., and Tahlan, K., and Thomas, C. M., and Tang,  
593 Y., and Truman, A. W., and Viaud, M., and Walton, J. D., and Walsh, C. T., and  
594 Weber, T., and van Wezel, G. P., and Wilkinson, B., and Willey, J. M., and  
595 Wohlleben, W., and Wright, G. D., and Ziemert, N., and Zhang, C., and Zotchev, S.  
596 B., and Breitling, R., and Takano, E., and Glockner, F. O. (2015) Minimum  
597 Information about a Biosynthetic Gene cluster, *Nat Chem Biol* 11, 625-631.

- 598 35. Blin, K., Medema, M. H., Kazempour, D., Fischbach, M. A., Breitling, R., Takano, E., and  
599 Weber, T. (2013) antiSMASH 2.0--a versatile platform for genome mining of  
600 secondary metabolite producers., *Nucleic Acids Res.* *41*, 1-9.
- 601 36. Gehring, A. M., Bradley, K. A., and Walsh, C. T. (1997) Enterobactin biosynthesis in  
602 *Escherichia coli*: isochorismate lyase (EntB) is a bifunctional enzyme that is  
603 phosphopantetheinylated by EntD and then acylated by EntE using ATP and 2,3-  
604 dihydroxybenzoate, *Biochemistry (Mosc.)* *36*, 8495-8503.
- 605 37. Patzer, S. I., and Braun, V. (2010) Gene cluster involved in the biosynthesis of  
606 griseobactin, a catechol-peptide siderophore of *Streptomyces* sp. ATCC 700974, *J.*  
607 *Bacteriol.* *192*, 426-435.
- 608 38. May, J. J., Wendrich, T. M., and Marahiel, M. A. (2001) The *dhb* Operon of *Bacillus*  
609 *subtilis* Encodes the Biosynthetic Template for the Catecholic Siderophore 2,3-  
610 Dihydroxybenzoate-Glycine-Threonine Trimeric Ester Bacillibactin, *J. Biol. Chem.*  
611 *276*, 7209-7217.
- 612 39. Baltz, R. H. (2014) MbtH homology codes to identify gifted microbes for genome mining,  
613 *J. Ind. Microbiol. Biotechnol.* *41*, 357-369.
- 614 40. Challis, G. L., Ravel, J., and Townsend, C. A. (2000) Predictive, structure-based model of  
615 amino acid recognition by nonribosomal peptide synthetase adenylation domains,  
616 *Chem. Biol.* *7*, 211-224.
- 617 41. Rodríguez-García, A., de la Fuente, Á., Pérez-Redondo, R., Martín, J. F., and Liras, P.  
618 (2000) Characterization and expression of the arginine biosynthesis gene cluster of  
619 *Streptomyces clavuligerus*., *J. Mol. Microbiol. Biotechnol.* *2*, 543-550.
- 620 42. Vetting, M. W., Luiz, L. P., Yu, M., Hegde, S. S., Magnet, S., Roderick, S. L., and  
621 Blanchard, J. S. (2005) Structure and functions of the GNAT superfamily of  
622 acetyltransferases, *Arch. Biochem. Biophys.* *433*, 212-226.
- 623 43. Chen, Y., Ntai, I., Ju, K. S., Unger, M., Zamdborg, L., Robinson, S. J., Doroghazi, J. R.,  
624 Labeda, D. P., Metcalf, W. W., and Kelleher, N. L. (2012) A proteomic survey of  
625 nonribosomal peptide and polyketide biosynthesis in actinobacteria, *J. Proteome Res.*  
626 *11*, 85-94.
- 627 44. Gubbens, J., Zhu, H., Girard, G., Song, L., Florea, B. I., Aston, P., Ichinose, K., Filippov,  
628 D. V., Choi, Y. H., Overkleeft, H. S., Challis, G. L., and van Wezel, G. P. (2014)  
629 Natural Product Proteomining, a Quantitative Proteomics Platform, Allows Rapid  
630 Discovery of Biosynthetic Gene Clusters for Different Classes of Natural Products.,  
631 *Chem. Biol.* *21*, 707-718.
- 632 45. Chen, Y., Unger, M., Ntai, I., McClure, R. A., Albright, J. C., Thomson, R. J., and  
633 Kelleher, N. L. (2013) Gobichelin A and B: Mixed-Ligand Siderophores Discovered  
634 Using Proteomics., *MedChemComm* *4*, 233-238.



- 635 46. Albright, J. C., Goering, A. W., Doroghazi, J. R., Metcalf, W. W., and Kelleher, N. L.  
636 (2014) Strain-specific proteogenomics accelerates the discovery of natural products  
637 via their biosynthetic pathways, *J Ind Microbiol Biotechnol* 41, 451-459.
- 638 47. Flores, F. J., and Martín, J. F. (2004) Iron-regulatory proteins DmdR1 and DmdR2 of  
639 *Streptomyces coelicolor* form two different DNA-protein complexes with iron boxes,  
640 *Biochem. J.* 380, 497-503.
- 641 48. Pérez-Redondo, R., Rodríguez-García, A., Botas, A., Santamarta, I., Martín, J. F., and  
642 Liras, P. (2012) ArgR of *Streptomyces coelicolor* is a versatile regulator, *PloS one* 7,  
643 e32697.
- 644 49. Gehring, A. M., Bradley, K. A., and Walsh, C. T. (1997) Enterobactin biosynthesis in  
645 *Escherichia coli*: Isochorismate lyase (EntB) is a bifunctional enzyme that is  
646 phosphopantetheinylated by EntD and then acylated by ente using ATP and 2,3-  
647 dihydroxybenzoate, *Biochemistry* 36, 8495-8503.
- 648 50. Schubert, S., Fischer, D., and Heesemann, J. (1999) Ferric enterochelin transport in  
649 *Yersinia enterocolitica*: molecular and evolutionary aspects., *J. Bacteriol.* 181, 6387-  
650 6395.
- 651 51. Lautru, S., and Challis, G. L. (2004) Substrate recognition by nonribosomal peptide  
652 synthetase multi-enzymes, *Microbiology* 150, 1629-1636.
- 653 52. Kodani, S., Bicz, J., Song, L., Deeth, R. J., Ohnishi-Kameyama, M., Yoshida, M., Ochi,  
654 K., and Challis, G. L. (2013) Structure and biosynthesis of scabichelin, a novel tris-  
655 hydroxamate siderophore produced by the plant pathogen *Streptomyces scabies*  
656 87.22, *Org. Biomol. Chem.* 11, 4686-4694.
- 657 53. Rodriguez-Garcia, A., de la Fuente, A., Perez-Redondo, R., Martin, J. F., and Liras, P.  
658 (2000) Characterization and expression of the arginine biosynthesis gene cluster of  
659 *Streptomyces clavuligerus*, *J. Mol. Microbiol. Biotechnol.* 2, 543-550.
- 660 54. Stachelhaus, T., Mootz, H. D., and Marahiel, M. A. (1999) The specificity-conferring code  
661 of adenylation domains in nonribosomal peptide synthetases, *Chem. Biol.* 6, 493-505.
- 662 55. Kieser, T., Bibb, M. J., Buttner, M. J., Chater, K. F. & Hopwood, D. A. (2000) *Practical*  
663 *Streptomyces genetics*, John Innes Foundation, Norwich, UK.
- 664 56. Bhaduri, S., and Demchick, P. H. (1983) Simple and rapid method for disruption of  
665 bacteria for protein studies, *Appl. Environ. Microbiol.* 46, 941-943.
- 666 57. Wessel, D., and Flügge, U. I. (1984) A method for the quantitative recovery of protein in  
667 dilute solution in the presence of detergents and lipids, *Anal. Biochem.* 138, 141-143.
- 668 58. Gubbens, J., Janus, M., Florea, B. I., Overkleeft, H. S., and van Wezel, G. P. (2012)  
669 Identification of glucose kinase-dependent and -independent pathways for carbon  
670 control of primary metabolism, development and antibiotic production in *Streptomyces*  
671 *coelicolor* by quantitative proteomics., *Mol. Microbiol.* 86, 1490-1507.

- 672 59. Boersema, P. J., Raijmakers, R., Lemeer, S., Mohammed, S., and Heck, A. J. R. (2009)  
673 Multiplex peptide stable isotope dimethyl labelling for quantitative proteomics, *Nat.*  
674 *Protoc.* 4, 484-494.
- 675 60. Cox, J., and Mann, M. (2008) MaxQuant enables high peptide identification rates,  
676 individualized p.p.b.-range mass accuracies and proteome-wide protein  
677 quantification., *Nat. Biotechnol.* 26, 1367-1372.
- 678 61. Rappsilber, J., Mann, M., and Ishihama, Y. (2007) Protocol for micro-purification,  
679 enrichment, pre-fractionation and storage of peptides for proteomics using StageTips,  
680 *Nat Protoc* 2, 1896-1906.
- 681 62. Gubbens, J., Janus, M., Florea, B. I., Overkleeft, H. S., and van Wezel, G. P. (2012)  
682 Identification of glucose kinase-dependent and -independent pathways for carbon  
683 control of primary metabolism, development and antibiotic production in *Streptomyces*  
684 *coelicolor* by quantitative proteomics, *Mol. Microbiol.* 86, 1490-1507.
- 685 63. Hiard, S., Marée, R., Colson, S., Hoskisson, P. A., Titgemeyer, F., van Wezel, G. P.,  
686 Joris, B., Wehenkel, L., and Rigali, S. (2007) PREDetector: A new tool to identify  
687 regulatory elements in bacterial genomes, *Biochem. Biophys. Res. Commun.* 357,  
688 861-864.
- 689 64. Rigali, S., Nivellet, R., and Tocquin, P. (2015) On the necessity and biological significance  
690 of threshold-free regulon prediction outputs, *Mol. BioSyst.* 11, 333-337.
- 691 65. Tunca, S., Barreiro, C., Sola-Landa, A., Coque, J. J. R., and Martín, J. F. (2007)  
692 Transcriptional regulation of the desferrioxamine gene cluster of *Streptomyces*  
693 *coelicolor* is mediated by binding of DmdR1 to an iron box in the promoter of the *desA*  
694 gene, *FEBS J.* 274, 1110-1122.
- 695 66. Rodriguez-Garcia, A., Ludovice, M., Martin, J. F., and Liras, P. (1997) Arginine boxes  
696 and the *argR* gene in *Streptomyces clavuligerus*: evidence for a clear regulation of  
697 the arginine pathway, *Mol Microbiol* 25, 219-228.
- 698



699 **TABLES**

700 **Table 1: Blastp analysis of NRPS cluster**

| Qch | length (AA) | predicted function                                 | Identity (%) | alignment length | E-value   | bitscore |
|-----|-------------|----------------------------------------------------|--------------|------------------|-----------|----------|
| A   | 325         | N-acetyl-gamma-glutamyl-phosphate reductase 2 ArgC | 76.31        | 325              | 2.00E-175 | 498      |
| B   | 32          | Questionable ORF                                   |              |                  |           |          |
| C   | 383         | Arginine biosynthesis bifunctional protein ArgJ    | 85.94        | 384              | 0         | 652      |
| D   | 311         | Acetylglutamate kinase ArgB                        | 79.86        | 283              | 3.00E-152 | 437      |
| E   | 398         | Acetylornithine aminotransferase ArgD              | 76.1         | 385              | 0         | 566      |
| F   | 474         | L-ornithine 5-monooxygenase                        | 71.4         | 437              | 0         | 627      |
| G   | 82          | Isochorismatase ACP domain                         | 55.41        | 74               | 2.00E-18  | 77.8     |
| H   | 326         | iron(III) dicitrate transport permease             | 33.94        | 330              | 5.00E-36  | 139      |
| I   | 4295        | Non-ribosomal peptide synthetase                   | 45.92        | 3151             | 0         | 2075     |
| J   | 3247        | Non-ribosomal peptide synthetase                   | 49.28        | 3253             | 0         | 2474     |
| K   | 70          | MbtH-like protein                                  | 74.24        | 66               | 9.00E-30  | 106      |
| L   | 670         | ABC transporter related protein                    | 51.21        | 537              | 6.00E-154 | 465      |
| M   | 570         | ABC transporter related protein                    | 52.87        | 592              | 4.00E-167 | 497      |
| N   | 268         | Siderophore-interacting protein                    | 46.21        | 264              | 9.00E-67  | 217      |
| O   | 362         | Ferric enterobactin transport system permease      | 53.08        | 341              | 1.00E-109 | 333      |
| P   | 372         | Transport system permease protein                  | 60.45        | 354              | 8.00E-115 | 346      |
| Q   | 203         | GNAT family N-acetyltransferase                    | 49.68        | 155              | 5.00E-34  | 125      |

701

702 **Table 2: Quantitative proteomics analysis**

| proteins                             | normalized expression ratio ( <sup>2</sup> log) <sup>a</sup> |      |      |      |      |      | number of quantifications <sup>b</sup> |     |     |     |     |     |
|--------------------------------------|--------------------------------------------------------------|------|------|------|------|------|----------------------------------------|-----|-----|-----|-----|-----|
|                                      | D/A                                                          | B/A  | B/D  | D/C  | E/C  | E/D  | D/A                                    | B/A | B/D | D/C | E/C | E/D |
| <b>Qinichelin</b>                    |                                                              |      |      |      |      |      |                                        |     |     |     |     |     |
| QchA/ArgC <sup>c</sup>               | -1.6                                                         | -0.8 | 1.0  | -1.7 | -2.2 | -0.3 | 7                                      | 7   | 7   | 3   | 3   | 3   |
| QchF                                 | -0.6                                                         | -2.4 | -2.3 | 0.1  | 0.4  | 0.0  | 8                                      | 8   | 8   | 7   | 7   | 7   |
| QchG                                 |                                                              |      |      | 1.7  | 1.2  | -0.7 | 1                                      | 1   | 1   | 3   | 3   | 3   |
| QchH                                 | -1.2                                                         | -2.5 | -1.2 | -1.0 | -1.5 | -1.2 | 6                                      | 6   | 6   | 4   | 4   | 4   |
| QchI                                 | -0.2                                                         | -3.1 | -3.3 | -0.7 | -1.1 | -0.5 | 12                                     | 12  | 12  | 7   | 7   | 7   |
| QchJ                                 | -1.3                                                         | -3.0 | -1.7 | -0.2 | -0.4 | -1.0 | 22                                     | 22  | 22  | 13  | 13  | 13  |
| <b>Enterobactin</b>                  |                                                              |      |      |      |      |      |                                        |     |     |     |     |     |
| EntA                                 | -2.1                                                         | -0.6 | 1.3  |      |      |      | 3                                      | 3   | 3   | 0   | 0   | 0   |
| EntB-IC                              | -0.8                                                         | 0.9  | 1.1  |      |      |      | 3                                      | 3   | 3   | 1   | 1   | 1   |
| <b>Griseobactin</b>                  |                                                              |      |      |      |      |      |                                        |     |     |     |     |     |
| GriG                                 | -1.3                                                         | -1.5 | 0.1  | -2.2 | -2.2 | -0.7 | 8                                      | 8   | 8   | 8   | 7   | 7   |
| GriF                                 |                                                              |      |      | -1.4 | -1.2 | -0.1 | 0                                      | 0   | 0   | 6   | 6   | 6   |
| GriE                                 | -0.8                                                         | -1.4 | -0.3 |      |      |      | 3                                      | 3   | 3   | 0   | 0   | 0   |
| <b>Arginine biosynthesis cluster</b> |                                                              |      |      |      |      |      |                                        |     |     |     |     |     |
| QchA /ArgC <sup>c</sup>              | -1.6                                                         | -0.8 | 1.0  | -1.7 | -2.2 | -0.3 | 7                                      | 7   | 7   | 3   | 3   | 3   |
| ArgJ                                 | -0.9                                                         | -0.9 | 0.0  | -0.6 | -0.8 | -0.9 | 7                                      | 7   | 7   | 6   | 5   | 5   |
| ArgD                                 | -1.0                                                         | -0.2 | 0.7  | -1.7 | -0.5 | 0.9  | 2                                      | 2   | 2   | 2   | 2   | 2   |
| ArgR                                 | -1.5                                                         | 0.1  | 1.5  | -2.5 | -1.0 | 1.1  | 9                                      | 9   | 9   | 4   | 4   | 4   |
| ArgG                                 | -0.6                                                         | -0.6 | -0.1 | -0.6 | -0.7 | 0.0  | 4                                      | 4   | 4   | 2   | 2   | 2   |
| ArgH                                 | -1.5                                                         | -1.1 | 0.6  | -1.7 | -0.8 | 0.5  | 8                                      | 8   | 8   | 9   | 9   | 9   |

703 <sup>a</sup> Changes in protein expression levels observed for the indicated proteins when compared among  
704 growth conditions A-E. <sup>b</sup> Number of quantifications events used to calculate the expression ratios.  
705 Quantifications based on less than two events (italicized) were discarded. <sup>c</sup> The sequences of QchA  
706 and ArgC were very similar, resulting in insufficient unique peptides for quantification. Instead,  
707 quantification is shown for non-unique peptides.

708

709 **Table 3: NMR data assignment of qinichelin (2) in D<sub>2</sub>O**

| Residue | position | <sup>13</sup> C <sup>a</sup> |                | <sup>1</sup> H |              |           | Carbon correlated in HMBC                         |
|---------|----------|------------------------------|----------------|----------------|--------------|-----------|---------------------------------------------------|
|         |          | δ <sub>c</sub>               | δ <sub>H</sub> | Intensity      | Multiplicity | J (Hz)    |                                                   |
| DHB     | 1        | 171.0                        | -              |                |              |           |                                                   |
|         | 2        | 117.8                        | -              |                |              |           |                                                   |
|         | 3        | 147.6                        | -              |                |              |           |                                                   |
|         | 4        | 145.5                        | -              |                |              |           |                                                   |
|         | 5        | 120.7                        | 7.11           | 1              | dd           | 8.5, 1.7  | DHB (C-3, C-4, C-7)                               |
|         | 6        | 120.7                        | 6.90           | 1              | t            | 8.5       | DHB (C-2, C-4)                                    |
|         | 7        | 120.6                        | 7.34           | 1              | dd           | 8.5, 1.7  | DHB (C-1, C-3, C-5)                               |
| Ser-1   | 1        | 173.5                        | -              |                |              |           |                                                   |
|         | 2        | 56.9                         | 4.66           | 1              | t            | 5.1       | Ser-1 (C-1, C-3), DHB (C-1)                       |
|         | 3        | 62.1                         | 4.00           | 3 <sup>b</sup> | m            |           | Ser-1 (C-1, C-2)                                  |
| Orn-2   | 1        | 174.5                        | -              |                |              |           |                                                   |
|         | 2        | 54.5                         | 4.44           | 1              | dd           | 8.5, 5.1  | Orn-2 (C-1, C-3, C-4), Ser-1 (C-1)                |
|         | 3        | 28.5                         | 1.96; 1.83     |                |              |           | Orn-2 (C-1, C-2, C-4, C-5)                        |
|         | 4        | 24.2                         | 1.76; 1.72     |                |              |           | Orn-2 (C-2, C-3, C-5)                             |
|         | 5        | 39.7                         | 3.02           | 2              | td           | 8.5, 0.85 | Orn-2 (C-3, C-4)                                  |
| Ser-3   | 1        | 172.2                        | -              |                |              |           |                                                   |
|         | 2        | 56.5                         | 4.53           | 1              | t            | 5.1       | Ser-3 (C-1, C-3), Orn-2 (C-1)                     |
|         | 3        | 62.0                         | 3.86           | 2              | m            |           | Ser-3 (C-1, C-2)                                  |
| Ser-4   | 1        | 171.2                        | -              |                |              |           |                                                   |
|         | 2        | 53.6                         | 5.03           | 1              | t            | 5.1       | Ser-4 (C-1, C-3), Ser-3 (C-1)                     |
|         | 3        | 61.4                         | 3.78           | 2              | d            | 5.1       | Ser-4 (C-1, C-2)                                  |
| hOrn-5  | 1        | 170.1                        | -              |                |              |           |                                                   |
|         | 2        | 53.8                         | 3.99           | 3 <sup>b</sup> | m            |           | hOrn-5 (C-1, C-3, C-4)                            |
|         | 3        | 28.8                         | 1.87           |                |              |           | hOrn-5 (C-1, C-2, C-5)                            |
|         | 4        | 22.2                         | 1.76           |                |              |           | hOrn-5 (C-5)                                      |
|         | 5        | 48.6                         | 3.65; 3.67     |                |              |           | hOrn-5 (C-3, C-4), <b>Ser-4 (C-1)<sup>c</sup></b> |
| chOrn-6 | 1        | 167.2                        | -              |                |              |           |                                                   |
|         | 2        | 51.5                         | 4.40           | 1              | dd           | 11.1, 6.0 | chOrn-6 (C-1, C-3), hOrn-5 (C-1)                  |
|         | 3        | 27.1                         | 1.84; 2.05     |                |              |           | chOrn-6 (C-1, C-2, C-4, C-5)                      |
|         | 4        | 21.0                         | 2.01; 1.94     |                |              |           |                                                   |
|         | 5        | 52.5                         | 3.61; 3.67     |                |              |           | chOrn-6 (C-3, C-4)                                |

710 <sup>a</sup>Chemical shifts of the carbon resonances are estimated from the HMBC data set. <sup>b</sup>Signals from C-3

711 of Ser-1, and C-2 of hOrn-5 overlapped and no clear integral could be measured. <sup>c</sup>key HMBC

712 correlation confirmed the hydroxamate bond between Ser-4 and hOrn-5.

713

714

715 **LEGENDS**

716

717 **Figure 1: NRPS BGCs involved in catechol-type siderophore biosynthesis in**  
718 ***Streptomyces* sp. MBT76.** BGCs for a potentially new siderophore **(a)**, for enterobactin **(b)**,  
719 and for griseobactin **(c)** could be identified. Carrier protein domains (ACP/PCP) are depicted  
720 in light blue, condensation domains in dark blue, epimerization domains in green, and  
721 thioesterase (termination) domains in yellow. Adenylation domains are shown in purple,  
722 together with their predicted substrates, and transport proteins in red. Triangles indicate the  
723 position of iron boxes likely bound by the iron repressor DmdR.

724

725 **Figure 2: Molecular structures of S213L (1), qinichelin (2), acetyl-qinichelin (3), and**  
726 **dehydroxy-qinichelin (4).** Abbreviations of moieties are shown to facilitate the comparison  
727 of respective structure. DHB, dihydroxybenzoate; Ser, serine; Orn, ornithine; hOrn,  $\delta$ -*N*-  
728 hydroxy-ornithine; chOrn, cyclized  $\delta$ -*N*-hydroxy-ornithine hydroxamate. Acetylation of  
729 qinichelin can occur on two positions as indicated. The shown configurations of DHB-D-Ser-L-  
730 Orn-D-Ser-L-Ser-L-hOrn-L-chOrn in qinichelins were deduced from biosynthetic  
731 considerations (see Figure 5).

732

733 **Figure 3: Comparison of qinichelin production by LC-MS analysis.** Spent medium  
734 samples of *Streptomyces* sp. MBT76 grown in conditions A-E **(a)**; and in condition A in the  
735 absence (red line) or presence (black line) of Fe<sup>3+</sup> **(b)**, respectively, were compared. Shown  
736 are summed traces of [M+H]<sup>+</sup> 772.3 *m/z* and [M+Fe<sup>3+</sup>-2H]<sup>+</sup> 825.3 *m/z* ± 0.5 Da.

737

738 **Figure 4: high resolution MS/MS analysis of qinichelin.** A spent medium sample of  
739 *Streptomyces* sp. MBT76 grown in condition A was subjected to high resolution LC-MS/MS  
740 analysis to obtain insights into the structures of unacetylated **(a)** and acetylated **(b)**  
741 qinichelin.

742

743

744 **Figure 5. Intertwined biosynthetic pathways of catechol-peptide siderophores in**

745 ***Streptomyces* sp. MBT76.** The functional crosstalk among four entirely separate gene

746 clusters ensures the assembly of two types of catechol-peptide siderophores, namely

747 qinichelins and griseobactin. The DHB is supplied by *ent* gene cluster, which is shared by

748 three NRPS systems. The DHB-hexapeptide backbone in qinichelin follows an orthodox

749 colinear extension model, while the Orn building block could arise from either *qch* or

750 canonical *arg* gene cluster. The differently modified Orn in the dashed boxes is likely

751 accepted by the  $A_{Om}$  domain of modules 2 and 5 to produce different qinichelin variants.

752

753

754

755

756 **Figure 1.**

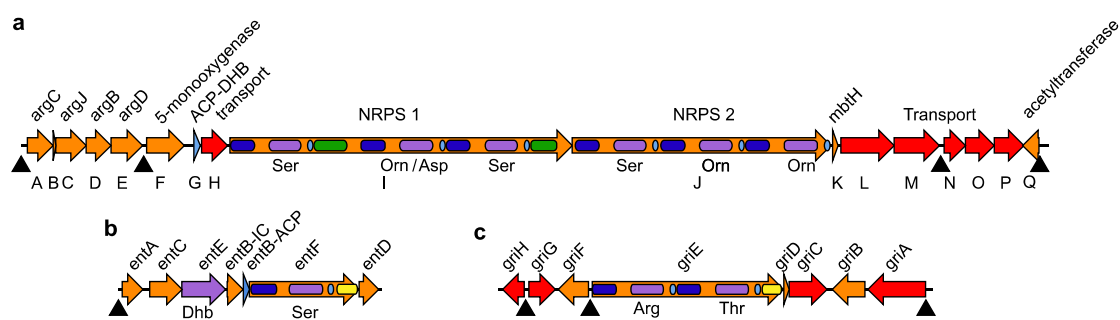

757

758

759

760

761 **Figure 2.**

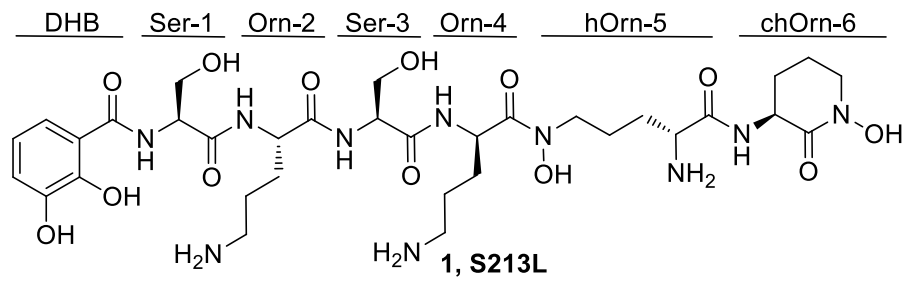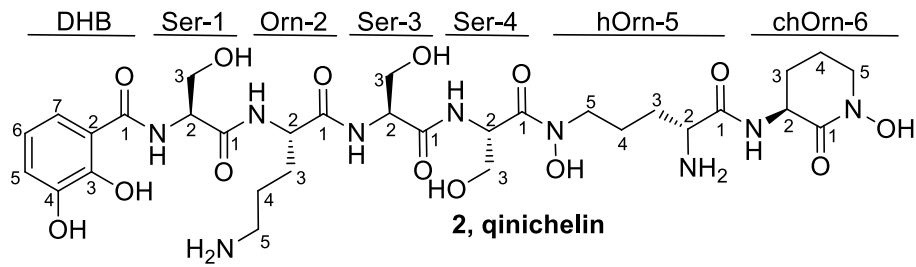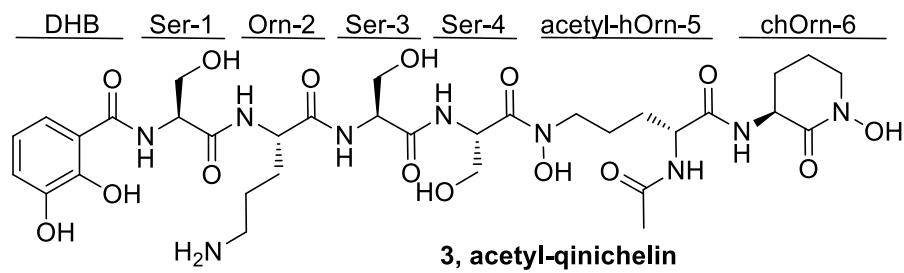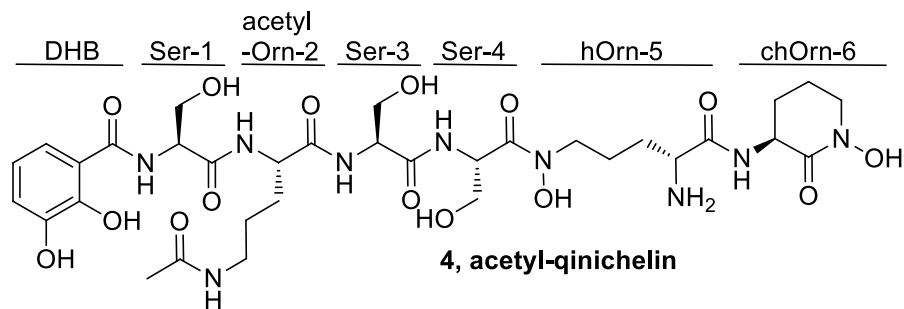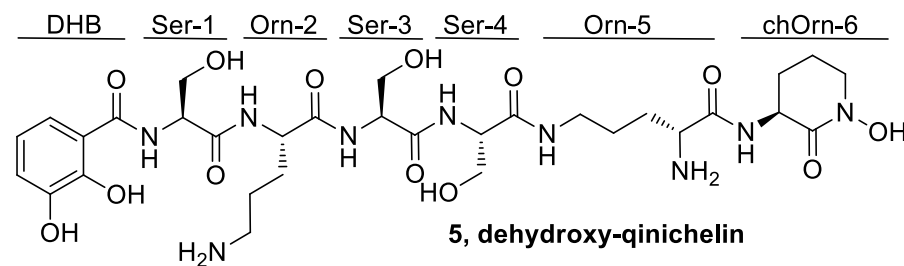

762

763

764 **Figure 3.**

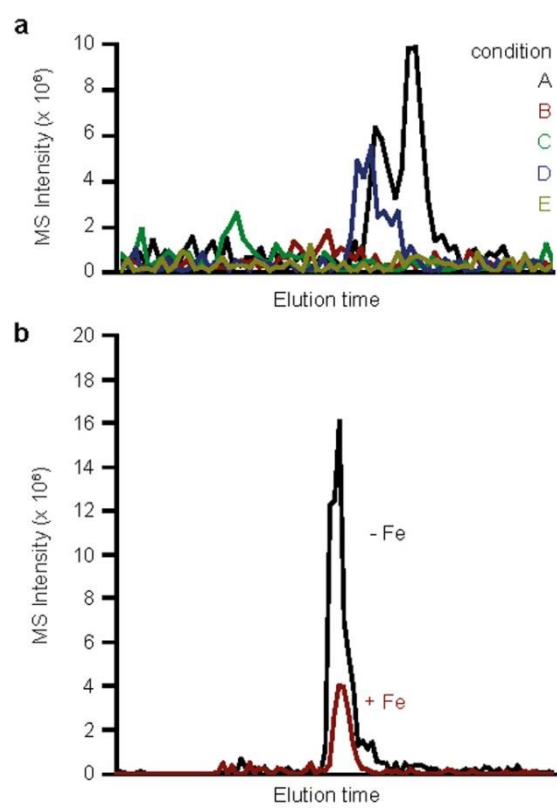

765

766



767 **Figure 4.**

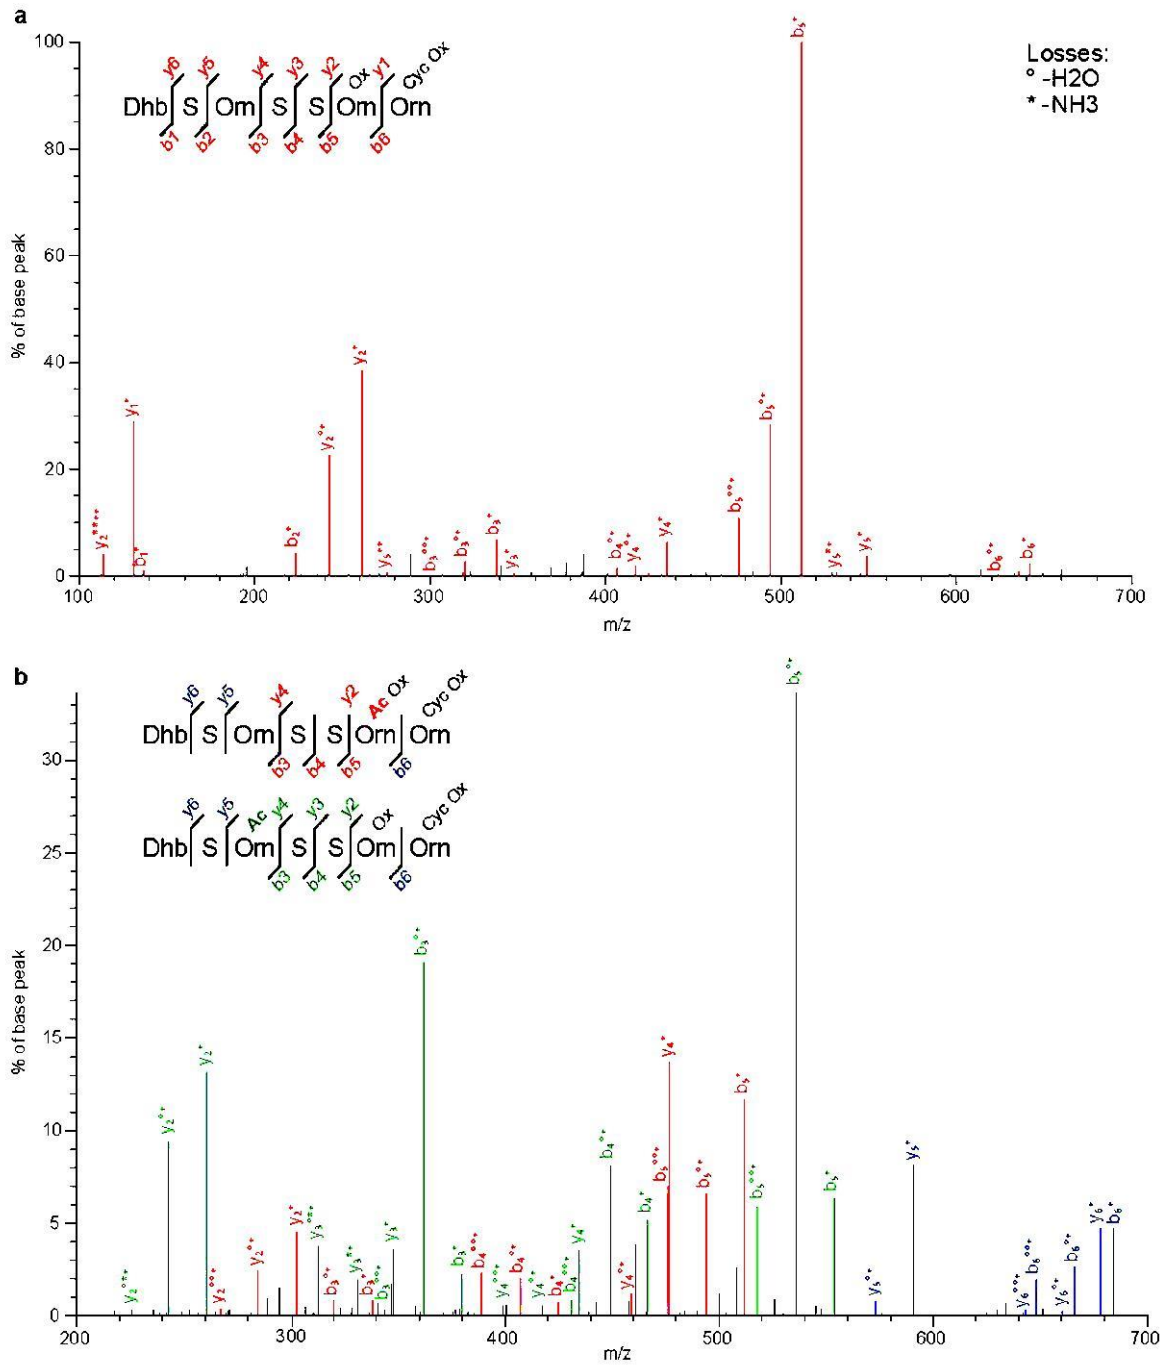

768

769

770

771 **Figure 5**

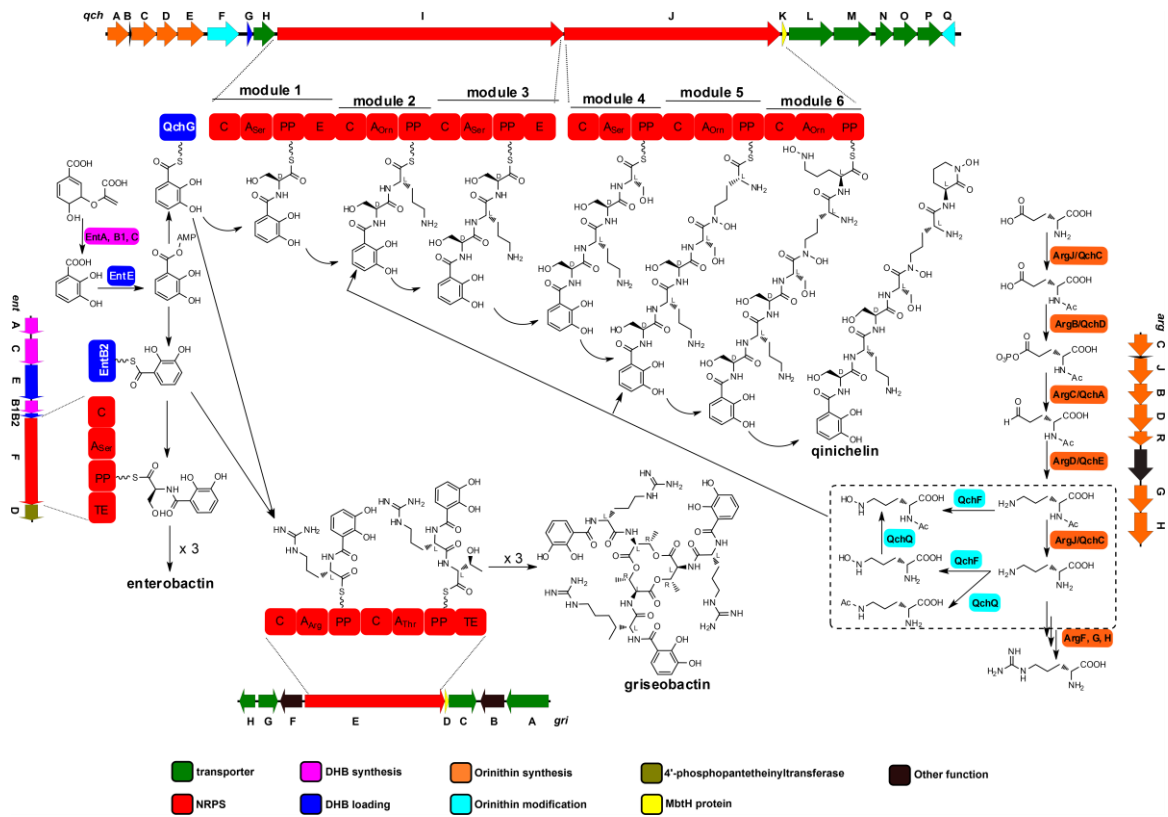

772

773
